1 **Behavioural stress feedback loops in benthic invertebrates caused by pH drop-induced metabolites**

2

3 Lauric Feugere<sup>1</sup>, Lauren Angell<sup>1</sup>, James Fagents<sup>1</sup>, Rebecca Nightingale<sup>1</sup>, Kirsty Rowland<sup>1</sup>, Saffiyah Skinner<sup>1</sup>,  
4 Jorg Hardege<sup>1</sup>, Helga Bartels-Hardege<sup>1</sup>, Katharina C. Wollenberg Valero<sup>1\*</sup>

5

6 <sup>1</sup> Department of Biological and Marine Sciences, University of Hull, Cottingham Road, Kingston-upon-Hull  
7 HU67RX, United Kingdom.

8 \*Corresponding author: k.wollenberg-valero@hull.ac.uk, ORCID: 0000-0001-8858-1804

9 **Abstract**

10 Studies on pH stress in marine animals typically focus on direct or species-specific aspects. We here test the  
11 hypothesis that a drop to pH = 7.6 indirectly affects the intra- and interspecific interactions of benthic  
12 invertebrates by means of chemical communication. We recorded fitness-relevant behaviours of small hermit  
13 crabs *Diogenes pugilator*, green shore crabs *Carcinus maenas*, and harbour ragworms *Hediste diversicolor* in  
14 response to short-term pH drop, and to putative stress metabolites released by conspecifics or gilt-head sea  
15 bream *Sparus aurata* during 30 minutes of acute pH drop. Not only did acute pH drop itself impair time to find  
16 a food cue in small hermit crabs and burrowing in harbour ragworms, but similar effects were observed under  
17 exposure to pH drop-induced stress metabolites. Stress metabolites from *S. aurata*, but not its regular control  
18 metabolites, also induced avoidance responses in all recipient species. Here, we confirm that a short-term  
19 abrupt pH drop, an abiotic stressor, has the capacity to trigger the release of metabolites which induce  
20 behavioural responses in conspecific and heterospecific individuals, which can be interpreted as a behavioural  
21 cost. Our findings that stress responses can be indirectly propagated through means of chemical  
22 communication warrant further research to confirm the effect size of the behavioural impairments caused by  
23 stress metabolites and to characterise their chemical nature.

24

25 **Keywords:** behavioural cost, stress propagation, stress metabolites, chemical communication, ocean  
26 acidification

## 27 **Introduction**

28 Compared to the open ocean, coastal areas and particularly intertidal zones are highly variable environments  
29 characterised by abrupt changes in water parameters. This includes fluctuations in pH beyond 0.3 units, the  
30 levels predicted for average change related to the process of ocean acidification towards the end of the century  
31 (Caldeira and Wickett, 2003; Sabine et al., 2004; IPCC, 2019). While this may mean that intertidal species are  
32 more resilient to climate change due to their acquired tolerances of pH fluctuations, it also forces them to live  
33 more frequently near their physiological tolerance limits (Truchot and Duhamel-Jouve, 1980; Hofmann et al.,  
34 2011; Sokolova, 2018; Wolfe et al., 2020). Superimposing ocean acidification on natural pH fluctuations may  
35 further increase the variability of organisms' responses (Eriander et al., 2015). Therefore, organisms inhabiting  
36 intertidal areas are interesting models to study the effects of short-term pH fluctuations within the IPCC  
37 predicted range. A low environmental pH can alter animal behaviour through several direct or indirect  
38 pathways, which include (i) deviation of energy budgets towards the stress response (Pörtner, 2008), (ii) fleeing  
39 to avoid the sources of stress (Pörtner and Peck, 2010; Abreu et al., 2016), (iii) disrupted information detection  
40 and processing leading to impaired decision-making (Briffa et al., 2012), and (iv) alteration of the chemical  
41 signals themselves impacting the sensory environment and the transfer of information (Wyatt et al., 2014;  
42 Roggatz et al., 2016, 2019). Behavioural effects triggered by lowered pH are known to occur in different  
43 taxonomic groups such as crustaceans (de la Haye et al., 2011), marine ragworms (Bond, 2018), and fish  
44 (Munday et al., 2009), although recent research debate on both their ubiquitousness and their effect size (Clark  
45 et al., 2020a; Clements et al., 2020b, but see Clark et al., 2020b; Munday et al., 2020).

46 In aquatic environments, where visibility can be limited, infochemicals and chemosensory functions, such as  
47 pheromones used for mating (Karlson and Lüscher, 1959) are crucial for communication (Hardege, 1999;  
48 Jordão and Volpato, 2000; Hay, 2009; Ashur et al., 2017). However, they are also a mechanism to propagate  
49 stress – but to date mostly researched within the context of biotic stressors. For example, alarm cues released  
50 following mechanical damage from fish epidermal club cells can trigger panic reactions in conspecifics and  
51 heterospecifics (Toa et al., 2004; Júnior et al., 2010). Such mechanisms of chemical communication also occur  
52 in invertebrates, as evidenced by the reduced out-of-burrow activity of the marine polychaete *Alitta virens*  
53 exposed to damaged conspecifics (Watson et al., 2005; Ende et al., 2017). Disturbance cues refer to chemicals  
54 that may be stored in gill epithelium or urine, and are released voluntarily or involuntarily by disturbed or  
55 stressed prey, to induce early antipredator responses in recipients to anticipate potential threats (Bairos-Novak  
56 et al., 2017; Goldman et al., 2020a). The central role of chemical communication in the aquatic environment  
57 and the recent evidence of its impairment by ocean acidification pinpoints the need for a deeper understanding  
58 of such potential environmental modulation of chemical signalling (Chivers et al., 2013).

59 Overall, though, it is not well understood yet whether abiotic stressors such as pH drop can also induce the  
60 release of chemical cues and whether these can propagate the stress response to other individuals. For such  
61 cues, we here introduce the term '*stress metabolites*' as defining such compounds released, voluntarily or not,  
62 by an organism in response to abiotic stressors. These can be detected and processed by conspecifics and/or  
63 heterospecifics, leading to the induction of a behavioural stress response (Hazlett, 1985). Such a mechanism

64 of indirect stress propagation might constitute positive feedback loops, defined as the propagation of stress  
65 responses within or between species by means of stress metabolites. Detecting stress metabolites may allow  
66 other individuals to modify their behaviour to avoid a change in the abiotic environment, and communities to  
67 coordinate or potentiate their response to ensure survival (Mothersill et al., 2007; Giacomini et al., 2015; Abreu  
68 et al., 2016). However, to investigate the function of any pH drop-induced chemical cues, the original stressor  
69 (pH drop) must first be removed from the experimental design.

70 In this study, we investigate the indirect effects of pH drop through stress metabolites induced by it on fitness-  
71 relevant behaviours within and among species inhabiting the intertidal zone. Using a full factorial design, we  
72 test the hypothesis that an acute pH drop to end-of-century level (7.6) will both directly and indirectly affect  
73 behaviour through the induction of stress metabolites. We observed three marine invertebrates (small hermit  
74 crab *Diogenes pugilator*, green shore crab *Carcinus maenas*, and harbour ragworm *Hediste diversicolor*)  
75 exposed to control pH and pH drop in combination with conditioned water from both conspecifics and their  
76 potential vertebrate predator, the gilt-head sea bream *S. aurata*.

77

## 78 **Methods**

### 79 ***Experimental design***

80 Small hermit crabs *Diogenes pugilator* and green shore crabs *Carcinus maenas* were collected in autumn at  
81 low tide in the Ria Formosa lagoon (Portugal). Harbour ragworms (*Hediste diversicolor*) were sourced via a  
82 local supplier (Valbaitis) from the Setubal lagoon (Portugal). Animals were acclimated for one week at pH 8.2  
83 in large communal tanks mimicking natural habitats at the Ramalhete Marine Station (CCMAR, Faro,  
84 Portugal) in a direct CO<sub>2</sub>-controlled system with *p*CO<sub>2</sub> constantly measured and adjusted as described in Sordo  
85 et al. (2016). Seawater parameters were measured daily (mean temperature: 18.90°C ± 0.97°C, mean salinity:  
86 35.58 ± 0.19, mean dissolved oxygen: 91.60% ± 2.15%). A total pool of approx. 100-120 *D. pugilator*, 150-  
87 200 *C. maenas*, and over 150 *H. diversicolor* was used during the experimental period, yielding a total of 921  
88 observations. Because no individual marking could be achieved, we aimed to space out the reuse of animals in  
89 successive behavioural assays by circulating animals through recovery tanks afterwards, before returning them  
90 to their stock population tanks once a day. Animal reuse was randomized across treatments and treatments  
91 randomized per day to prevent any confounding effects on the measured behaviours. All experiments were  
92 conducted in October 2019, except one independent set of observations (n = 40) in *C. maenas* conducted in  
93 September 2018, which was analysed together with the 2019 data with the year treated as a covariate.

94 A three-way factorial design of pH drop x stress metabolites x donor species was generated to study the effects  
95 of acute pH drop, stress metabolites induced by it, and their combination versus a control containing regular  
96 metabolites (control metabolites) (Figure 1). Metabolite donor species were *D. pugilator*, *C. maenas*, *H.*  
97 *diversicolor* (called conspecific donors) and the potential predator *Sparus aurata* (called heterospecific donor).  
98 Metabolite donors were conditioned for 30 minutes in seawater at regular pH (pH 8.2, 400 µatm CO<sub>2</sub>,  
99 putatively inducing control metabolite release), or pH drop (pH 7.6, 700 µatm CO<sub>2</sub>, putatively inducing stress  
100 metabolite release). Recipient species were *D. pugilator*, *C. maenas*, and *H. diversicolor* which received water

101 containing either conspecific or heterospecific metabolites). To achieve the full factorial design, recipient  
102 species received either control or stress metabolites and were tested in either control pH (8.2) or pH drop (pH  
103 = 7.6), by re-adjusting the pH of the conditioned water before each bioassay. Overall, four different  
104 experimental treatments were obtained: (i) putative control metabolites at pH 8.2 (CM), (ii) putative control  
105 metabolites at pH 7.6 (pH drop), (iii) putative stress metabolites at pH 8.2 (SM), (iv) and putative stress  
106 metabolites at pH 7.6 (pH drop+SM). Testing conspecific and heterospecific metabolites with three recipient  
107 species amounted to a total of twelve treatments. Prior to use in recipient species, conditioned seawater from  
108 *H. diversicolor* and *S. aurata* (0.0067 fish/L) was tenfold diluted in fresh system seawater at the desired pH.  
109 To explore the possibility that stress metabolites are equivalent to highly concentrated control metabolites, we  
110 additionally tested the effects of undiluted *S. aurata* control metabolites at pH 8.2 in *H. diversicolor* and *D.*  
111 *pugilator*. See supplementary information for further details on treatments (Table S1) and water conditioning  
112 (supplementary methods).

113

#### 114 ***Behavioural bioassays and respirometry***

115 For each of the four conditions, we measured the time to find a feeding cue (1/10 diluted mussel juice) vs. a  
116 mock (seawater) cue in *D. pugilator* and *C. maenas*, or to bury the head entirely in the sand in *H. diversicolor*,  
117 and dubbed this variable ‘time-to-success’. Behavioural assays were terminated once the animal successfully  
118 grabbed the ballasted sponge containing the feeding cue with their pincers (*D. pugilator* and *C. maenas*) or  
119 buried its entire head (*H. diversicolor*), or at a maximum time of 300 seconds. Both feeding and burrowing  
120 behaviours are tested response variables in crabs (de la Haye et al., 2012; Wang et al., 2018) and ragworm  
121 (Bhuiyan et al., 2021) exposed to pH drop. Additionally, avoidance behaviour was binary coded. In *D.*  
122 *pugilator* and *C. maenas*, these avoidance behaviours included freezing (suddenly retreating into the shell or  
123 attempting to burrow, sudden and lasting arrest in locomotion), and escaping (walking along the walls or  
124 retreating into a corner of the tank). Such freeze and escape behaviours indicate danger in crustaceans (Katz  
125 and Rittschof, 1993; Perrot-Minnot et al., 2017; Tomsic et al., 2017). In *H. diversicolor*, avoidance behaviours  
126 consisted of freezing, which might be accompanied by spread of jaws, sideways-undulating behaviour, and  
127 formation of a noticeable slime cap whilst outside the sediment. These behaviours indicate extreme stress in  
128 marine polychaetes (Mouneyrac et al., 2003; Burlinson and Lawrence, 2007; McBriarty et al., 2018). The  
129 feeding cues were randomly assigned left or right to the crabs. Additionally, respiration rates of *C. maenas*  
130 were monitored immediately after their use in feeding behaviour assays in a two-way factorial design of pH  
131 drop x stress metabolites using only conspecific donor metabolites. See supplementary methods for further  
132 details on behavioural assays and respirometry.

133

#### 134 ***Statistical analysis***

135 Avoidance behaviours were analysed using generalised linear models for logit regression with binomial  
136 distribution using the *stats* R package (R Core Team, 2020). Time-to-success was modelled for the time to  
137 reach a feeding cue in *D. pugilator* and *C. maenas* or to burrow the head in *H. diversicolor* depending on the

138 three predictors: pH drop, stress metabolites, and donor. Time-to-success data was analysed with a time-to-  
139 event analysis (also called survival analysis) using Cox proportional hazard models from the *survival* R  
140 package (Therneau and Grambsch, 2000; Therneau, 2021). The event being the success of food cue location  
141 (in crabs) or burrowing the head in sediment (in worms), the analysis was hereafter referred to as ‘time-to-  
142 success analysis’. The exponentiated estimates (hazard ratios) from the Cox proportional hazard models were  
143 expressed as ‘success ratio’. Success ratios were visualised using the *plot\_model* function from the *sjPlot* R  
144 package (Lüdtke, 2021). The ‘success probability’ (the probability of the feeding or burrowing event  
145 occurring at any time over 300s) over time was represented by Kaplan-Meier curves drawn using the *survminer*  
146 R package (Kassambara et al., 2020). Animals not reaching the feeding cue or not burying their head were  
147 censored and assigned the maximum time of ‘300+’. The oxygen measurements were transformed using the  
148 additive-inverse slope coefficients standardised to the carapace width and rescaled to the mean additive-inverse  
149 slope coefficient of the control CM as shown in equation (1) to yield respiration rates.

$$150 \text{ respiration rate} = (-a/\text{size})/(\text{mean} - a \text{ of control}) \quad \text{Equation (1)}$$

151 where  $a$  is the slope of the oxygen levels (%) as a function of time (s) and the size is proxied by the carapace  
152 width.

153 All statistical models always included the main effects and interaction terms of the binary predictors pH drop  
154 (pH = 8.2 vs. pH = 7.6), stress metabolites (stress metabolites vs. control metabolites), and donor (conspecific  
155 vs. heterospecific). Covariates (year, number of water uses, crab size, where relevant) were included in models  
156 when deemed significant compared to the null model by an ANOVA Chi-square test from the *stats* R package  
157 (R Core Team, 2020). Overall model fit p-values were retrieved from the ANOVA Chi-squared test or the  
158 Likelihood ratio test for generalised linear models and Cox-proportional models, respectively. Pairwise  
159 comparisons between treatments involved in the interaction term between the three predictors were obtained  
160 from statistical models using the *emmeans* R package (Lenth, 2021), wherein false discovery rate p-value  
161 adjustments were applied for post-hoc term-wide multiple testing.

162 To investigate the possibility that stress metabolites are equivalent to highly concentrated control metabolites  
163 (which were present in CM and pH drop treatments but in tenfold dilution), additional tests compared the  
164 behavioural response of *D. pugilator* and *H. diversicolor* to tenfold diluted stress metabolites and control  
165 metabolites to that of undiluted control metabolites from *S. aurata*.

166 Effect sizes of the respiration rates were measured as Cohen’s  $d$  using the *effsize* R package (Torchiano, 2020)  
167 for estimates between two groups, or according to Lenhard and Lenhard (2016) for estimates of the interaction  
168 term between pH drop and stress metabolites predictors. Effect sizes were classified following the  
169 classification given in Sawilowsky (2009). All statistical analyses were conducted in RStudio (RStudio Team,  
170 2020) with a significance threshold of  $P \leq 0.05$ . See R script, datasets, and supplementary information for  
171 further details.



172 **Results**

173 ***Response of small hermit crab Diogenes pugilator to pH, stress metabolite, and donor predictors***

174 The time-to-success analysis was not conclusive for the stress metabolite predictor in *D. pugilator* (Figure 2A,  
175 Table 1,  $Z = -0.66$ ,  $P = 0.5073$ ). On the other hand, the Cox proportional hazard model (overall Likelihood  
176 ratio test model fit:  $P = 0.06$ ) found that both pH drop (feeding success ratio = 0.47,  $Z = -2.14$ ,  $P = 0.0325$ ) and  
177 metabolites from *S. aurata* (feeding success ratio = 0.35,  $Z = -2.76$ ,  $P = 0.0058$ ) had significant negative effects  
178 on the feeding success ratio of *D. pugilator*. In addition, there was a significant interaction between pH drop  
179 and metabolite donor terms on the feeding success of *D. pugilator* ( $Z = 2.19$ ,  $P = 0.0289$ ). Overall, pH drop  
180 induced a significantly lower success (risk) score in the conspecific treatment (Figure 2B). Post-hoc analyses  
181 evidenced that all treatments (CM, pH drop, SM, and pH drop+SM) induced similar feeding time responses in  
182 both the conspecific and heterospecific donor groups (Table S2).

183 Avoidance responses of *D. pugilator* did not depend on pH drop ( $Z = 0.25$ ,  $P = 0.8049$ ) nor stress metabolites  
184 ( $Z = -0.25$ ,  $P = 0.7995$ , overall Chi-square test model fit:  $P < 0.0001$ , Table 2), but were significantly more  
185 pronounced when metabolites originated from *S. aurata* (69%) instead of conspecifics (26%,  $Z = 2.46$ ,  $P =$   
186  $0.0139$ , Figure 3, Table 2). After splitting the display of avoidance behaviour by donor, pairwise comparisons  
187 failed to find differences between the four treatments (CM, pH drop, SM, and pH drop+SM), but confirmed  
188 that the donor effect existed across all four treatments (Table S3, Figure 3). However, partitioning the  
189 avoidance behaviour of *D. pugilator* into freezing and escaping responses evidenced that escaping significantly  
190 increased with *S. aurata* control metabolites only when tested in pH drop (Figures S1-S2, Tables S4-S7, see  
191 supplementary results).

192

193 ***Response of green shore crab Carcinus maenas to pH, stress metabolite, and donor predictors***

194 The Cox proportional hazard model (overall Likelihood ratio test model fit:  $P = 0.009$ ) showed that the feeding  
195 success ratio of *C. maenas* did not significantly vary with pH ( $Z = -0.80$ ,  $P = 0.4247$ ), metabolites ( $Z = 0.68$ ,  $P$   
196  $= 0.4989$ ), nor donor ( $Z = 1.09$ ,  $P = 0.2773$ ) terms (Figure 2, Table 1). Nevertheless, all interaction terms were  
197 significant. Post-hoc tests revealed that time-to-success responses were similar across treatments CM, pH drop,  
198 SM, and pH drop+SM when *C. maenas* received conspecific metabolites (Table S8). This pattern changed  
199 when *S. aurata* was the metabolite donor as evidenced by significantly lower feeding success scores in *C.*  
200 *maenas* exposed to pH drop ( $Z = 2.97$ ,  $P = 0.0179$ ), SM ( $Z = 2.48$ ,  $P = 0.0394$ ), and the trend for pH drop+SM  
201 ( $Z = 2.20$ ,  $P = 0.0563$ ), compared to the control CM.

202 In *C. maenas*, the predictors pH drop ( $Z = -1.23$ ,  $P = 0.2195$ ), stress metabolites ( $Z = -1.23$ ,  $P = 0.2195$ ), and  
203 donor ( $Z = -1.23$ ,  $P = 0.5785$ ) did not alter avoidance responses but their interaction terms were significant  
204 (overall Chi-square test model fit:  $P < 0.0001$ , Table 2, Figure 3). Pairwise comparisons showed no differences  
205 between the four treatments (CM, pH drop, SM, pH drop+SM) in avoidance patterns of *C. maenas* receiving  
206 conspecific metabolites. Conversely, *C. maenas* facing *S. aurata* metabolites while experiencing treatments of  
207 pH drop (94%,  $Z = -3.60$ ,  $P = 0.0020$ ), SM (75%,  $Z = -3.28$ ,  $P = 0.0031$ ), and pH drop+SM (56%,  $Z = -2.33$ ,  
208  $P = 0.04$ ) significantly increased their avoidance display compared to control CM (18%). Moreover, pH drop

209 combined with stress metabolites (pH drop+SM treatment) instead of control metabolites (pH drop treatment)  
210 significantly lowered avoidance behaviours ( $Z = 2.21$ ,  $P = 0.0405$ , Table S9, Figure 3). Partitioning the  
211 avoidance behaviour of *C. maenas* into freezing and escaping responses evidenced that escaping explained the  
212 avoidance response whereas no clear patterns were observed in the freezing behaviour (Figures S1-S2, Tables  
213 S10-S13, see supplementary results). Lastly, neither pH drop nor stress metabolites altered the respiration rates  
214 of *C. maenas* although the interaction was near to significant ( $P = 0.0531$ , Figure S3, Table S14).

215

### 216 ***Response of harbour ragworm Hediste diversicolor to pH, stress metabolite, and donor predictors***

217 Burrowing success responses of *H. diversicolor* did not depend on the donor species ( $P = 0.1093$ , Figure 2,  
218 Table 1). However, the Cox proportional hazard model (overall Likelihood ratio test model fit:  $P < 0.0001$ )  
219 evidenced that both pH drop (burrowing success ratio = 0.30,  $Z = -3.91$ ,  $P < 0.0001$ ) and stress metabolites  
220 (burrowing success ratio = 0.35,  $Z = -3.42$ ,  $P = 0.0006$ ) terms significantly altered burrowing time responses  
221 of *H. diversicolor*. Significant interactions between the main predictors required to decipher the involvement  
222 of within-donor treatment effects (Table S15). Post-hoc tests revealed that pH drop ( $Z = 3.91$ ,  $P = 0.0006$ ), SM  
223 ( $Z = 3.43$ ,  $P = 0.0012$ ), and pH drop+SM ( $Z = 3.47$ ,  $P = 0.0012$ ) treatments significantly lowered burrowing  
224 success scores compared to the control CM in *H. diversicolor* exposed to conspecific metabolites. Moreover,  
225 *H. diversicolor* facing *S. aurata* metabolites had lower burrowing success scores in the pH drop+SM treatment  
226 compared to the control CM ( $Z = 3.35$ ,  $P = 0.0049$ ).

227 *H. diversicolor* displayed more avoidance in response to *S. aurata* metabolites (47%) compared to conspecific  
228 metabolites (20%,  $Z = 1.09$ ,  $P = 0.0006$ , overall Chi-square test model fit:  $P < 0.0001$ , Table 2, Figures 3). *H.*  
229 *diversicolor* exposed to *S. aurata* metabolites were not affected by pH drop ( $Z = -0.01$ ,  $P = 0.9906$ ) whereas  
230 stress metabolites induced significantly more avoidance than control metabolites ( $Z = -5.30$ ,  $P < 0.0001$ , overall  
231 Chi-square test model fit:  $P < 0.0001$ , Table 2). There were no differences across pH drop, SM, and pH  
232 drop+SM treatments in *H. diversicolor* receiving conspecific metabolites (Table S16). Pairwise comparisons  
233 revealed that the SM treatment (93%) triggered significantly more avoidance than CM (33%,  $Z = -4.31$ ,  $P =$   
234  $0.0001$ ) and pH drop+SM treatments (51%,  $Z = 3.92$ ,  $P = 0.0003$ ). Specimens of *H. diversicolor* exposed to *S.*  
235 *aurata* metabolites displayed different avoidance responses in the control treatment CM (video 1) compared  
236 to pH drop (slowed-down burrowing response, video 2), SM (sideways-undulating behaviour with body flips,  
237 video 3), and pH drop+SM (raised head and spread mouth parts with freezing behaviour in video 4 and slowed-  
238 down movement with sideways undulating behaviour in video 5).

239

## 240 **Discussion**

### 241 ***Direct effects of pH drop and donor type on assay success and avoidance behaviours***

242 Changes in fitness-relevant behaviours to acute pH change can be expected to show high variance and small  
243 effect sizes (Clark et al., 2020a), and may therefore require large observational datasets. In this study, we  
244 performed over 900 behavioural observations, and our results reflect this high variance. *Sparus aurata*-  
245 conditioned water, whether it contained control metabolites or pH stress-induced metabolites, elicited



246 avoidance in all recipient species which can be attributed to antipredator behaviours. Despite the donor effect  
247 however, much of the behavioural variance was explained by the effects of pH drop and stress metabolites,  
248 their interaction, or their interaction with the donor term (Figure 2).

249 We found that pH drop lowered success ratios in feeding and burrowing in *Diogenes pugilator* and *Hediste*  
250 *diversicolor*, respectively. Such low pH-induced impairments of fitness-relevant behaviours were previously  
251 found in hermit crabs *Pagurus bernhardus* and *P. tanneri* and may indicate impaired decision-making (de la  
252 Haye et al., 2011, 2012; Kim et al., 2015). Past literature also reported delayed burrowing responses in the  
253 harbour ragworm *H. diversicolor* exposed for 28 days to pH drop (Bhuiyan et al., 2021), and an inverse  
254 relationship between burrowing and pH in the king ragworm *Alitta virens* (Batten and Bamber, 1996). These  
255 behavioural alterations may reflect the cost of acid-base regulation to counteract hypercapnia (Pörtner, 2008),  
256 as marine ragworms overexpress the acid-base regulator *Carbonic Anhydrase (CA)* at the expense of energy  
257 reserves in response to acidification (Freitas et al., 2016; Wage et al., 2016). In the longer term, behavioural  
258 costs of an altered burrowing activity may extend to crucial ecological functions as shown by the diminished  
259 bioturbation activity of *H. diversicolor* in similar conditions (Bond, 2018). In contrast, *Carcinus maenas* did  
260 not delay its feeding response to pH drop in presence of conspecific metabolites, which supports recent  
261 observations of ocean acidification having weaker effects than previously expected on marine animal  
262 behaviour (Clark et al., 2020a; Clements et al., 2020a, 2020b, 2021) including feeding responses in aquatic  
263 arthropods (Clements and Darrow, 2018). The resilience to pH stress in *C. maenas* may be due to their  
264 extracellular pH regulatory capacities allowing them to maintain feeding during short-term assays (Appelhans  
265 et al., 2012). Therefore, short-term hypercapnia is not a strong stressor in *C. maenas*, due to its pH-variable  
266 intertidal habitat (Fehsenfeld et al., 2011), which is supported by its ability to maintain respiration rates in our  
267 study. Other than reduced success ratios, pH drop itself did not induce any avoidance behaviours indicative of  
268 stress.

269 Besides the direct effect of pH drop on behaviour, previous studies on ocean acidification also found  
270 contrasting effects of pH drop on predator-prey interactions (Draper and Weissburg, 2019). Here, we observed  
271 an increased escaping tendency of *C. maenas* in response to *S. aurata* control metabolites in pH drop but not  
272 in control pH. Although this was not the main focus of our study, it could mean that pH drop renders predator  
273 odour more potent for its prey, for example through pH-dependent changes in odour molecular structure,  
274 receptor binding, or information processing (Munday et al., 2009; Roggatz et al., 2016, 2019; Schirmacher et  
275 al., 2020).

### 276 277 ***Indirect effects of pH drop on recipients' behaviour through stress chemical communication***

278 Despite the above-mentioned species-specific direct effects of pH drop on behaviour success ratios, we could  
279 show here that pH drop also has indirect effects on behaviour by altering chemical communication. We found  
280 that stress metabolites released by animals exposed to pH drop altered feeding and burrowing, and increased  
281 avoidance behaviours, but that the response was donor and recipient species-specific. Hermit crabs *D.*  
282 *pugilator* did not react to any stress metabolites. Significant responses in the other two recipient species,

283 however, were directionally equivalent to those induced by pH drop itself since it took longer to find a food  
284 cue or to burrow the head in the presence of stress metabolites. Although behavioural stress response  
285 propagation through chemical communication is well documented for alarm substances and disturbance cues  
286 upon predation stress (Giacomini et al., 2015; Abreu et al., 2016; Mathuru, 2016), our results show here that  
287 chemical communication induced by abiotic stressors such as pH drop can trigger the release of waterborne  
288 chemicals that in turn trigger a behavioural stress response in its recipients. Stress metabolites conditioned by  
289 the potential predator *S. aurata* induced more avoidance behaviours and delayed feeding in *C. maenas* and  
290 burrowing in *H. diversicolor*, compared to *S. aurata* control metabolites. Similarly, the presence of conspecific  
291 stress metabolites significantly lowered *H. diversicolor* burrowing success ratio compared to conspecific  
292 control metabolites.

293 On the other hand, *C. maenas* did not react to conspecific stress metabolites. The different behavioural effect  
294 of conspecific stress metabolites between crabs and *H. diversicolor* has several possible explanations ranging  
295 from different defence strategies related to stress risk perception and evaluation (Hazlett, 1985; Bairos-Novak  
296 et al., 2017, 2018; Goldman et al., 2020b) to different types, concentrations, or ratios of the released chemicals  
297 (Júnior et al., 2010; Morishita and Barreto, 2011). As we have shown here a pH drop to 7.6 is not a strong  
298 stressor in crabs (Fehsenfeld et al., 2011) which may explain that we failed to observe responses to water from  
299 pH drop-conditioned conspecific green shore crabs. However, the presence of stress metabolites conditioned  
300 by *S. aurata* caused a marked drop in the success ratio of *C. maenas* at low (but not control) pH, evidenced by  
301 significant interaction terms.

302 Whilst we did not investigate their chemical structure, our experiment allows us to characterize novel  
303 properties of stress metabolites. Stress metabolites, like disturbance cues, potentially consist of regularly  
304 excreted metabolites such as urea and ammonia (Bairos-Novak et al., 2017; Shrivastava et al., 2019). The fact  
305 that behavioural responses of *H. diversicolor* and *D. pugilator* remained unchanged even when we used  
306 undiluted control metabolites (Tables S17-S18), might mean that stress metabolites are not just up-  
307 concentrated control metabolites. We also observed that avoidance behaviours by both *C. maenas* and *H.*  
308 *diversicolor* became less pronounced with subsequent water uses, showing that the cues are either volatile or  
309 have a very short half-life (less than half a day) in seawater. Alternatively, recipients may be able to  
310 discriminate degraded versus fresh metabolites and react accordingly to the degree of threat they may indicate  
311 (Fuselier et al., 2009; Bairos-Novak et al., 2018). This shows that stress metabolites induced by pH drop are  
312 either not identical with metabolites released in normal pH, and/or are at least more than tenfold higher  
313 concentrated than control metabolites.

314 The avoidance behaviours we recorded in this study are known indicators of stress. *S. aurata* stress metabolites  
315 elicited atypical freezing, eversion of the proboscis, mucus secretion, flipping and sideways-undulating  
316 behaviours in *H. diversicolor* which were previously described as indicators for a physiological stress response  
317 following exposure to copper sulphate (Burlinson and Lawrence, 2007), antiparasitic drugs (McBriarty et al.,  
318 2018), and trace metals (Mouneyrac et al., 2003). We also observed increased freeze and escape responses in

319 crabs, which indicate a stress response in crustaceans (Katz and Rittschof, 1993; Perrot-Minnot et al., 2017;  
320 Tomsic et al., 2017).

321 The finding that *S. aurata* pH-induced stress metabolites induced such responses in potential prey species  
322 suggests that responses to disturbance cues are not depending on the ‘audience’, similar as what has been  
323 observed in tadpoles (Bairos-Novak et al., 2020). In our study, stress metabolites from *H. diversicolor* altered  
324 the burrowing success of conspecifics whereas Watson and colleagues (2005) found that whole-body extracts  
325 of *H. diversicolor* did not alter out-of-burrow activities of the king ragworm *Alitta virens* (of the same  
326 subfamily Nereidinae), indicating that stress metabolites may also differ from alarm cues.

327 A directionally similar response to pH drop and to the stress metabolites it induces shows that pH drop can  
328 have indirect effects, reminiscent of a positive feedback loop, by which stressed animals negatively influence  
329 fitness-relevant behaviours of community members. This was first observed by Hazlett (1985) after freshwater  
330 crayfish exposed to water conditioned with heat-stressed conspecifics displayed increased alertness, after  
331 returning the conditioned water to normal temperature. Similar indirect effects through chemical signalling  
332 from stressed donors to unstressed recipients were also shown in response to different types of biotic stressors  
333 such as mock predator chase (Toa et al., 2004; Giacomini et al., 2015), handling (Barcellos et al., 2011), and  
334 acute fasting (Abreu et al., 2016), and to physical injury including irradiation (Mothersill et al., 2007) and  
335 predation (Frisch, 1938; Mathuru et al., 2012; Oliveira et al., 2013).

336

### 337 ***Conclusions and Perspectives***

338 In this study, we could show that short-term pH drop of a similar magnitude of that experienced within the  
339 intertidal zone, but also aligned to end-of-century predicted average values (Chavez et al., 2017; Landschützer  
340 et al., 2018), had negative consequences on fitness-relevant behaviours in harbour ragworm *H. diversicolor*  
341 and small hermit crab *D. pugilator*. Additionally, we confirm that pH drop events also impede the same  
342 behaviours in the same way indirectly via chemical communication, albeit these effects depended on donor  
343 and recipient species. Sea bream *S. aurata* and harbour ragworm *H. diversicolor* stressed by pH drop released  
344 stress metabolites which likely differ from control metabolites and negatively affect fitness-relevant  
345 behaviours in metabolite recipients. Stress metabolites induced similar avoidance behaviours as those exhibited  
346 under physiological stress, meaning that a stress response was propagated from donor to recipient. These  
347 negative indirect effects, or positive feedback loops, warrant further study, especially as our results were  
348 inconclusive with regards to the combined treatments of low pH and stress metabolites. Short-term pH drops  
349 thus involve behavioural additionally to metabolic trade-offs, which is also of interest for better predicting the  
350 response of natural and aquaculture systems under ocean acidification combined with tidal pH fluctuations.  
351 We are hopeful that our more than 900 observations and balanced experimental design could overcome most  
352 potential limitations, in relation to pseudoreplication due to reusing some animals on different days, and any  
353 overestimation of effect sizes related to small sample size (Clements et al., 2020b). Given the potential high  
354 ecological significance of indirect negative effects of pH fluctuations on population fitness, studies aiming to

355 replicate our results should aim to further optimise our experimental design with better technical equipment as  
356 that available to us (Baker, 2016).

357 **Funding**

358 This work was supported by the Natural Environment Research Council (NERC) [NE/T001577/1]; and the  
359 University of Hull [funding towards the MolStressH2O research cluster].

360

361 **Competing Interests**

362 The authors declare no conflicts of interest.

363

364 **Ethics**

365 All experiments were approved by the University of Hull Ethics Committee under the approvals U020 and  
366 FEC\_2019\_81.

367

368 **Authors' contributions**

369 KWV designed the study. Experiments were performed by LF, SS, LA, JF, RN, KR, and KWV. LF analysed  
370 the data and wrote the first manuscript draft with KWV, JDH and HBH. All authors contributed to the final  
371 manuscript.

372

373 **Acknowledgements**

374 The authors wish to acknowledge J. Pena dos Reis, P. Hubbard, Z. Velez, and all staff members of the  
375 CCMAR-Ramalhete Marine Station. JDH and KWV acknowledge funding by Natural Environment Research  
376 Council (NERC grant #NE/T001577/1), and KWV, JDH and LF acknowledge funding by the University of  
377 Hull towards the MolStressH2O research cluster. We thank Andrea Murcia for the drawings of *Diogenes*  
378 *pugillator*, *Sparus aurata*, and *Hediste diversicolor*.

379 **References**

- 380 Abreu, M. S., Giacomini, A. C. V., Gusso, D., Koakoski, G., Oliveira, T. A., Marqueze, A., et al. (2016).  
381 Behavioral responses of zebrafish depend on the type of threatening chemical cues. *J. Comp. Physiol. A*  
382 *Neuroethol. Sens. Neural Behav. Physiol.* 202, 895–901. doi:10.1007/s00359-016-1129-5.
- 383 Appelhans, Y. S., Thomsen, J., Pansch, C., Melzner, F., and Wahl, M. (2012). Sour times: seawater  
384 acidification effects on growth, feeding behaviour and acid–base status of *Asterias rubens* and *Carcinus*  
385 *maenas*. *Mar. Ecol. Prog. Ser.* 459, 85–98. doi:10.3354/meps09697.
- 386 Ashur, M. M., Johnston, N. K., and Dixon, D. L. (2017). Impacts of Ocean Acidification on Sensory  
387 Function in Marine Organisms. *Integr. Comp. Biol.* 57, 63–80. doi:10.1093/icb/ix010.
- 388 Bairos-Novak, K. R., Crane, A. L., Achtymichuk, G. H., Hsin, J., Rivera-Hernández, I. A. E., Simko, O. M.,  
389 et al. (2020). Forget the audience: tadpoles release similar disturbance cues regardless of kinship or  
390 familiarity. *Behav. Ecol. Sociobiol.* 74(12), 1–10. doi:10.1007/s00265-020-02936-8.
- 391 Bairos-Novak, K. R., Crane, A. L., Chivers, D. P., and Ferrari, M. C. O. (2018). Better the devil you know?  
392 How familiarity and kinship affect prey responses to disturbance cues. *Behav. Ecol.* 30, 446–454.  
393 doi:10.1093/beheco/ary184.
- 394 Bairos-Novak, K. R., Mitchell, M. D., Crane, A. L., Chivers, D. P., and Ferrari, M. C. O. (2017). Trust thy  
395 neighbour in times of trouble: background risk alters how tadpoles release and respond to disturbance  
396 cues. *Proc. Biol. Sci.* 284(1863), 20171465. doi:10.1098/rspb.2017.1465.
- 397 Baker, M. (2016). 1,500 scientists lift the lid on reproducibility. *Nature* 533, 452–454. doi:10.1038/533452a.
- 398 Barcellos, L. J. G., Volpato, G. L., Barreto, R. E., Coldebella, I., and Ferreira, D. (2011). Chemical  
399 communication of handling stress in fish. *Physiol. Behav.* 103, 372–375.  
400 doi:10.1016/j.physbeh.2011.03.009.
- 401 Batten, S. D., and Bamber, R. N. (1996). The effects of acidified seawater on the polychaete *Nereis virens*  
402 *Sars, 1835*. *Mar. Pollut. Bull.* 32, 283–287. doi:10.1016/0025-326X(95)00163-H.
- 403 Bhuiyan, K. A., Rodríguez, B. M., Pires, A., Riba, I., Dellvals, Á., Freitas, R., et al. (2021). Experimental  
404 evidence of uncertain future of the keystone ragworm *Hediste diversicolor* (O.F. Müller, 1776) under  
405 climate change conditions. *Sci. Total Environ.* 750, 142031. doi:10.1016/j.scitotenv.2020.142031.
- 406 Bond, D. (2018). Ocean acidification threat? How pH affects burrowing behaviour of *Nereis diversicolor* and  
407 its bearing on mass extinction scenarios. in (EGU General Assembly Conference Abstracts), 6416.
- 408 Briffa, M., de la Haye, K., and Munday, P. L. (2012). High CO<sub>2</sub> and marine animal behaviour: potential  
409 mechanisms and ecological consequences. *Mar. Pollut. Bull.* 64, 1519–1528.  
410 doi:10.1016/j.marpolbul.2012.05.032.
- 411 Burlinson, F. C., and Lawrence, A. J. (2007). Development and validation of a behavioural assay to measure  
412 the tolerance of *Hediste diversicolor* to copper. *Environ. Pollut.* 145, 274–278.  
413 doi:10.1016/j.envpol.2005.03.014.
- 414 Caldeira, K., and Wickett, M. E. (2003). Oceanography: anthropogenic carbon and ocean pH. *Nature* 425,  
415 365. doi:10.1038/425365a.



- 416 Chavez, F. P., Pennington, J. T., Michisaki, R. P., Blum, M., Chavez, G. M., Friederich, J., et al. (2017).  
417 Climate variability and change: response of a coastal ocean ecosystem. *Oceanography* 30, 128–145.  
418 Available at: <https://www.jstor.org/stable/26367631>.
- 419 Chivers, D. P., Dixson, D. L., White, J. R., McCormick, M. I., and Ferrari, M. C. O. (2013). Degradation of  
420 chemical alarm cues and assessment of risk throughout the day. *Ecol. Evol.* 3, 3925–3934.  
421 doi:10.1002/ece3.760.
- 422 Clark, T. D., Raby, G. D., Roche, D. G., Binning, S. A., Speers-Roesch, B., Jutfelt, F., et al. (2020a). Ocean  
423 acidification does not impair the behaviour of coral reef fishes. *Nature* 577, 370–375.  
424 doi:10.1038/s41586-019-1903-y.
- 425 Clark, T. D., Raby, G. D., Roche, D. G., Binning, S. A., Speers-Roesch, B., Jutfelt, F., et al. (2020b). Reply  
426 to: Methods matter in repeating ocean acidification studies. *Nature* 586, E25–E27. doi:10.1038/s41586-  
427 020-2804-9.
- 428 Clements, J. C., and Darrow, E. S. (2018). Eating in an acidifying ocean: a quantitative review of elevated  
429 CO<sub>2</sub> effects on the feeding rates of calcifying marine invertebrates. *Hydrobiologia* 820, 1–21.  
430 doi:10.1007/s10750-018-3665-1.
- 431 Clements, J. C., Poirier, L. A., Pérez, F. F., Comeau, L. A., and Babarro, J. M. F. (2020a). Behavioural  
432 responses to predators in Mediterranean mussels (*Mytilus galloprovincialis*) are unaffected by elevated  
433 pCO<sub>2</sub>. *Mar. Environ. Res.* 161, 105148. doi:10.1016/j.marenvres.2020.105148.
- 434 Clements, J. C., Ramesh, K., Nysveen, J., Dupont, S., and Jutfelt, F. (2021). Animal size and sea water  
435 temperature, but not pH, influence a repeatable startle response behaviour in a wide-ranging marine  
436 mollusc. *Anim. Behav.* 173, 191–205. doi:10.1016/j.anbehav.2020.12.008.
- 437 Clements, J., Sundin, J., Clark, T. D., and Jutfelt, F. (2020b). An extreme decline effect in ocean acidification  
438 ecology. *EcoEvoRxiv*. doi:10.32942/osf.io/k9dbv.
- 439 de la Haye, K. L., Spicer, J. I., Widdicombe, S., and Briffa, M. (2011). Reduced sea water pH disrupts  
440 resource assessment and decision making in the hermit crab *Pagurus bernhardus*. *Anim. Behav.* 82(3),  
441 495–501. doi:10.1016/j.anbehav.2011.05.030.
- 442 de la Haye, K. L., Spicer, J. I., Widdicombe, S., and Briffa, M. (2012). Reduced pH sea water disrupts  
443 chemo-responsive behaviour in an intertidal crustacean. *J. Exp. Mar. Bio. Ecol.* 412, 134–140.  
444 doi:10.1016/j.jembe.2011.11.013.
- 445 Draper, A. M., and Weissburg, M. J. (2019). Impacts of Global Warming and Elevated CO<sub>2</sub> on Sensory  
446 Behavior in Predator-Prey Interactions: A Review and Synthesis. *Front. Ecol. Evol.* 7, 307.  
447 doi:10.3389/fevo.2019.00072.
- 448 Ende, S. S. W., Capelle, J., Kals, J., Schrama, J. W., and Verreth, J. A. J. (2017). A matter of perception: The  
449 influence of waterborne signals from fish and conspecifics on the feeding related behavior of *Alitta*  
450 *virens* (Sars). *J. Exp. Mar. Bio. Ecol.* 496, 91–96. doi:10.1016/j.jembe.2017.08.004.
- 451 Eriander, L., Wrangé, A.-L., and Havenhand, J. N. (2015). Simulated diurnal pH fluctuations radically  
452 increase variance in—but not the mean of—growth in the barnacle *Balanus improvisus*. *ICES J. Mar.*

- 453 *Sci.* 73, 596–603. doi:10.1093/icesjms/fsv214.
- 454 Fehsenfeld, S., Kiko, R., Appelhans, Y., Towle, D. W., Zimmer, M., and Melzner, F. (2011). Effects of  
455 elevated seawater pCO<sub>2</sub> on gene expression patterns in the gills of the green crab, *Carcinus maenas*.  
456 *BMC Genomics* 12, 488. doi:10.1186/1471-2164-12-488.
- 457 Freitas, R., Pires, A., Moreira, A., Wrona, F. J., Figueira, E., and Amadeu M V (2016). Biochemical  
458 alterations induced in *Hediste diversicolor* under seawater acidification conditions. *Marine*  
459 *Environmental Research* 117, 75–84. doi:10.1016/j.marenvres.2016.04.003.
- 460 Frisch, K. (1938). Zur Psychologie des Fisch-Schwarmes. *Naturwissenschaften* 26, 601–606.  
461 doi:10.1007/BF01590598.
- 462 Fuselier, L., Rugg, M., Korpi, N., and Wisenden, B. (2009). Lab and field estimates of active time of  
463 chemical alarm cues of a cyprinid fish and an amphipod crustacean. *Behaviour* 146, 1423–1442.  
464 doi:10.1163/156853909X440998.
- 465 Giacomini, A. C. V. V., de Abreu, M. S., Koakoski, G., Idalêncio, R., Kalichak, F., Oliveira, T. A., et al.  
466 (2015). My stress, our stress: blunted cortisol response to stress in isolated housed zebrafish. *Physiol.*  
467 *Behav.* 139, 182–187. doi:10.1016/j.physbeh.2014.11.035.
- 468 Goldman, J. A., Désormeaux, I. S., and Brown, G. E. (2020a). Disturbance cues as a source of risk  
469 assessment information under natural conditions. *Freshwater Biology* 65, 981–986.  
470 doi:10.1111/fwb.13484.
- 471 Goldman, J. A., Feyten, L. E. A., Ramnarine, I. W., and Brown, G. E. (2020b). Sender and receiver  
472 experience alters the response of fish to disturbance cues. *Curr. Zool.* 66, 255–261.  
473 doi:10.1093/cz/zoz050.
- 474 Hardege, J. D. (1999). Nereidid polychaetes as model organisms for marine chemical ecology.  
475 *Hydrobiologia* 402, 145–161. doi:10.1023/A:1003740509104.
- 476 Hay, M. E. (2009). Marine chemical ecology: chemical signals and cues structure marine populations,  
477 communities, and ecosystems. *Ann. Rev. Mar. Sci.* 1, 193–212.  
478 doi:10.1146/annurev.marine.010908.163708.
- 479 Hazlett, B. A. (1985). Disturbance pheromones in the crayfish *Orconectes virilis*. *J. Chem. Ecol.* 11, 1695–  
480 1711. doi:10.1007/BF01012121.
- 481 Hofmann, G. E., Smith, J. E., Johnson, K. S., Send, U., Levin, L. A., Micheli, F., et al. (2011). High-  
482 frequency dynamics of ocean pH: a multi-ecosystem comparison. *PLoS One* 6, e28983.  
483 doi:10.1371/journal.pone.0028983.
- 484 IPCC (2019). IPCC Special Report on the Ocean and Cryosphere in a Changing Climate. , ed. H.-O. Pörtner,  
485 D.C. Roberts, V. Masson-Delmotte, P. Zhai, M. Tignor, E. Poloczanska, K. Mintenbeck, A. Alegría, M.  
486 Nicolai, A. Okem, J. Petzold, B. Rama, N.M. Weyer (eds.) Intergovernmental Panel on Climate  
487 Change.
- 488 Jordão, L. C., and Volpato, G. L. (2000). Chemical Transfer of Warning Information in Non-Injured Fish.  
489 *Behaviour* 137, 681–690. doi:10.1163/156853900502286.

- 490 Júnior, A. B., Magalhães, E. J., Hoffmann, A., and Ide, L. M. (2010). Conspecific and heterospecific alarm  
491 substance induces behavioral responses in piau fish *Leporinus piau*. *Acta Ethol.* 13, 119–126.  
492 doi:10.1007/s10211-010-0081-6.
- 493 Karlson, P., and Lüscher, M. (1959). Pheromone. *Naturwissenschaften* 46, 63–64. doi:10.1007/BF00599084.
- 494 Kassambara, A., Kosinski, M., and Biecek, P. (2020). Drawing Survival Curves using “ggplot2” [R package  
495 survminer version 0.4.8]. Available at: <https://CRAN.R-project.org/package=survminer>.
- 496 Katz, J. N., and Rittschof, D. (1993). Alarm/investigation responses of hermit crabs as related to shell fit and  
497 crab size. *Mar. Behav. Physiol.* 22, 171–182. doi:10.1080/10236249309378845.
- 498 Kim, T. W., Taylor, J., Lovera, C., and Barry, J. P. (2015). CO<sub>2</sub>-driven decrease in pH disrupts olfactory  
499 behaviour and increases individual variation in deep-sea hermit crabs. *ICES J. Mar. Sci.* 73, 613–619.  
500 doi:10.1093/icesjms/fsv019.
- 501 Landschützer, P., Gruber, N., Bakker, D. C. E., Stemmler, I., and Six, K. D. (2018). Strengthening seasonal  
502 marine CO<sub>2</sub> variations due to increasing atmospheric CO<sub>2</sub>. *Nature Climate Change* 8, 146–150.  
503 doi:10.1038/s41558-017-0057-x.
- 504 Lenhard, W., and Lenhard, A. (2016). Computation of effect sizes. *Dettelbach Psychom. Dettelbach,*  
505 *Germany: Psychometrica*. doi:10.13140/RG.2.2.17823.92329.
- 506 Lenth, R. (2021). emmeans: estimated marginal means, aka least-squares means. R package version 1.5.5-1.  
507 Available at: <https://cran.r-project.org/web/packages/emmeans>.
- 508 Lüdecke, D. (2021). Data Visualization for Statistics in Social Science. R package sjPlot version 2.8.7.  
509 Available at: <https://CRAN.R-project.org/package=sjPlot>.
- 510 Mathuru, A. S. (2016). Conspecific injury raises an alarm in medaka. *Sci. Rep.* 6, 36615.  
511 doi:10.1038/srep36615.
- 512 Mathuru, A. S., Kibat, C., Cheong, W. F., Shui, G., Wenk, M. R., Friedrich, R. W., et al. (2012). Chondroitin  
513 fragments are odorants that trigger fear behavior in fish. *Curr. Biol.* 22, 538–544.  
514 doi:10.1016/j.cub.2012.01.061.
- 515 McBriarty, G. J., Kidd, K. A., and Burridge, L. E. (2018). Short-Term Effects of the Anti-sea Lice  
516 Therapeutant Emamectin Benzoate on Clam Worms (*Nereis virens*). *Arch. Environ. Contam. Toxicol.*  
517 74, 539–545. doi:10.1007/s00244-017-0461-2.
- 518 Morishita, V. R., and Barreto, R. E. (2011). Black sea urchins evaluate predation risk using chemical signals  
519 from a predator and injured con- and heterospecific prey. *Mar. Ecol. Prog. Ser.* 435, 173–181.  
520 doi:10.3354/meps09253.
- 521 Mothersill, C., Smith, R. W., Agnihotri, N., and Seymour, C. B. (2007). Characterization of a radiation-  
522 induced stress response communicated in vivo between zebrafish. *Environ. Sci. Technol.* 41, 3382–  
523 3387. doi:10.1021/es062978n.
- 524 Mouneyrac, C., Mastain, O., Amiard, J. C., Amiard-Triquet, C., Beaunier, P., Jeantet, A.-Y., et al. (2003).  
525 Trace-metal detoxification and tolerance of the estuarine worm *Hediste diversicolor* chronically  
526 exposed in their environment. *Mar. Biol.* 143, 731–744.

- 527 Munday, P. L., Dixson, D. L., Donelson, J. M., Jones, G. P., Pratchett, M. S., Devitsina, G. V., et al. (2009).  
528 Ocean acidification impairs olfactory discrimination and homing ability of a marine fish.
- 529 Munday, P. L., Dixson, D. L., Welch, M. J., Chivers, D. P., Domenici, P., Grosell, M., et al. (2020). Methods  
530 matter in repeating ocean acidification studies. *Nature* 586, E20–E24. doi:10.1038/s41586-020-2803-x.
- 531 Oliveira, T. A., Koakoski, G., Kreutz, L. C., Ferreira, D., da Rosa, J. G. S., de Abreu, M. S., et al. (2013).  
532 Alcohol impairs predation risk response and communication in zebrafish. *PLoS One* 8, e75780.  
533 doi:10.1371/journal.pone.0075780.
- 534 Perrot-Minnot, M.-J., Banchetry, L., and Cézilly, F. (2017). Anxiety-like behaviour increases safety from  
535 fish predation in an amphipod crustacea. *R Soc Open Sci* 4, 171558. doi:10.1098/rsos.171558.
- 536 Pörtner, H. (2008). Ecosystem effects of ocean acidification in times of ocean warming: a physiologist's  
537 view. *Mar. Ecol. Prog. Ser.* 373, 203–217. doi:10.3354/meps07768.
- 538 Pörtner, H. O., and Peck, M. A. (2010). Climate change effects on fishes and fisheries: towards a cause-and-  
539 effect understanding. *J. Fish Biol.* 77, 1745–1779. doi:10.1111/j.1095-8649.2010.02783.x.
- 540 R Core Team (2020). R: A Language and Environment for Statistical Computing. Available at:  
541 <https://www.R-project.org/>.
- 542 Roggatz, C. C., Fletcher, N., Benoit, D. M., Algar, A. C., Doroff, A., Wright, B., et al. (2019). Saxitoxin and  
543 tetrodotoxin bioavailability increases in future oceans. *Nat. Clim. Chang.* 9, 840–844.  
544 doi:10.1038/s41558-019-0589-3.
- 545 Roggatz, C. C., Lorch, M., Hardege, J. D., and Benoit, D. M. (2016). Ocean acidification affects marine  
546 chemical communication by changing structure and function of peptide signalling molecules. *Glob.*  
547 *Chang. Biol.* 22, 3914–3926. doi:10.1111/gcb.13354.
- 548 RStudio Team (2020). RStudio: Integrated Development Environment for R. Available at:  
549 <http://www.rstudio.com/>.
- 550 Sabine, C. L., Feely, R. A., Gruber, N., Key, R. M., Lee, K., Bullister, J. L., et al. (2004). The oceanic sink  
551 for anthropogenic CO<sub>2</sub>. *Science* 305, 367–371. doi:10.1126/science.1097403.
- 552 Sawilowsky, S. S. (2009). New Effect Size Rules of Thumb. *J. Mod. Appl. Stat. Methods* 8, 26.  
553 doi:10.22237/jmasm/1257035100.
- 554 Schirmmacher, P., Roggatz, C. C., Benoit, D. M., and Hardege, J. D. (2020). Ocean Acidification Amplifies  
555 the Olfactory Response to 2-Phenylethylamine: Altered Cue Reception as a Mechanistic Pathway?  
556 *bioRxiv*, 2020.10.08.329870. doi:10.1101/2020.10.08.329870.
- 557 Shrivastava, J., Ndugwa, M., Caneos, W., and De Boeck, G. (2019). Physiological trade-offs, acid-base  
558 balance and ion-osmoregulatory plasticity in European sea bass (*Dicentrarchus labrax*) juveniles under  
559 complex scenarios of salinity variation, ocean acidification and high ammonia challenge. *Aquat.*  
560 *Toxicol.* 212, 54–69. doi:10.1016/j.aquatox.2019.04.024.
- 561 Sokolova, I. (2018). Mitochondrial Adaptations to Variable Environments and Their Role in Animals' Stress  
562 Tolerance. *Integr. Comp. Biol.* 58, 519–531. doi:10.1093/icb/icy017.
- 563 Sordo, L., Santos, R., Reis, J., Shulika, A., and Silva, J. (2016). A direct CO<sub>2</sub> control system for ocean

- 564 acidification experiments: testing effects on the coralline red algae *Phymatolithon lusitanicum*. *PeerJ* 4,  
565 e2503. doi:10.7717/peerj.2503.
- 566 Therneau, T. M. (2021). Survival Analysis [R package survival version 3.2-10]. Available at:  
567 <https://CRAN.R-project.org/package=survival>.
- 568 Therneau, T. M., and Grambsch, P. M. (2000). Modeling Survival Data: Extending the Cox Model. *Statistics*  
569 *for Biology and Health*. doi:10.1007/978-1-4757-3294-8.
- 570 Toa, D. G., Afonso, L. O. B., and Iwama, G. K. (2004). Stress response of juvenile rainbow trout  
571 (*Oncorhynchus mykiss*) to chemical cues released from stressed conspecifics. *Fish Physiol. Biochem.*  
572 30, 103–108. doi:10.1007/s10695-005-0266-5.
- 573 Tomsic, D., Sztarker, J., Berón de Astrada, M., Oliva, D., and Lanza, E. (2017). The predator and prey  
574 behaviors of crabs: from ecology to neural adaptations. *J. Exp. Biol.* 220, 2318–2327.  
575 doi:10.1242/jeb.143222.
- 576 Torchiano, M. (2020). Efficient Effect Size Computation [R package effsize version 0.8.1]. Available at:  
577 <https://CRAN.R-project.org/package=effsize>.
- 578 Truchot, J. P., and Duhamel-Jouve, A. (1980). Oxygen and carbon dioxide in the marine intertidal  
579 environment: diurnal and tidal changes in rockpools. *Respir. Physiol.* 39, 241–254. doi:10.1016/0034-  
580 5687(80)90056-0.
- 581 Wage, J., Rohr, S., Hardege, J. D., and Rotchell, J. M. (2016). Short-term effects of CO<sub>2</sub>-induced low pH  
582 exposure on target gene expression in *Platynereis dumerilii*. *Journal of Marine Biology &*  
583 *Oceanography* 5, 2. doi:10.4172/2324-8661.1000155.
- 584 Wang, Y., Hu, M., Wu, F., Storch, D., and Pörtner, H.-O. (2018). Elevated pCO<sub>2</sub> affects feeding behavior  
585 and acute physiological response of the brown crab *Cancer pagurus*. *Front. Physiol.* 9, 1164.  
586 doi:10.3389/fphys.2018.01164.
- 587 Watson, G. J., Hamilton, K. M., and Tuffnail, W. E. (2005). Chemical alarm signalling in the polychaete  
588 *Nereis (Neanthes) virens* (Sars) (Annelida: Polychaeta). *Anim. Behav.* 70, 1125–1132.  
589 doi:10.1016/j.anbehav.2005.03.011.
- 590 Wolfe, K., Nguyen, H. D., Davey, M., and Byrne, M. (2020). Characterizing biogeochemical fluctuations in  
591 a world of extremes: A synthesis for temperate intertidal habitats in the face of global change. *Glob.*  
592 *Chang. Biol.* 26, 3858–3879. doi:10.1111/gcb.15103.
- 593 Wyatt, T. D., Hardege, J. D., and Terschak, J. (2014). Ocean acidification foils chemical signals. *Science*  
594 346, 176. doi:10.1126/science.346.6206.176-a.

595 **Tables**

596

597 **Table 1.** Results of Cox proportional hazard model for the main effects of predictors (pH drop, stress  
 598 metabolites, donor) on the time-to-success analysis in small hermit crab (*Diogenes pugilator*, n = 320  
 599 observations with 120 events of finding a food cue), green shore crab (*Carcinus maenas*, n = 189 observations  
 600 with 122 events of finding a food cue), and harbour ragworm (*Hediste diversicolor*, n = 325 observations with  
 601 234 events of burrowing head in sediment). Unsuccessful observations are censored. Significance ( $P \leq 0.05$ )  
 602 is shown by p-values in bold. Overall significance of the models using Likelihood ratio tests were: *D. pugilator*:  
 603  $P = 0.06$ ; *C. maenas*:  $P = 0.009$ ; *H. diversicolor*:  $P < 0.0001$ ). Covariates were dropped from models after  
 604 analyses of deviance showed that they passed the Chi-squared test (*D. pugilator*: number of water uses:  $P =$   
 605  $0.1163$ , crab size:  $P = 0.6318$ ; *C. maenas*: number of water uses:  $P = 0.6104$ , crab size:  $P = 0.9995$ , year:  $P =$   
 606  $0.3348$ ; *H. diversicolor*: number of water uses:  $P = 0.2649$ ). Success ratio (aka hazard ratio) is the  
 607 exponentiated estimate. SE is the standard error of estimate.

608

| Predictors                       | Success (hazard) ratio | Estimate | SE     | Z       | P                  |
|----------------------------------|------------------------|----------|--------|---------|--------------------|
| <b><i>D. pugilator</i></b>       |                        |          |        |         |                    |
| pH drop                          | <b>0.4702</b>          | -0.7546  | 0.3530 | -2.1378 | <b>0.0325</b>      |
| stress metabolites               | 0.8106                 | -0.2100  | 0.3167 | -0.6631 | 0.5073             |
| donor                            | <b>0.3460</b>          | -1.0613  | 0.3843 | -2.7613 | <b>0.0058</b>      |
| pH drop:stress metabolites       | 1.7878                 | 0.5810   | 0.4858 | 1.1959  | 0.2317             |
| pH drop:donor                    | <b>3.2842</b>          | 1.1891   | 0.5441 | 2.1853  | <b>0.0289</b>      |
| stress metabolites:donor         | 1.4970                 | 0.4034   | 0.5326 | 0.7575  | 0.4487             |
| pH drop:stress metabolites:donor | 0.4168                 | -0.8752  | 0.7498 | -1.1672 | 0.2431             |
| <b><i>C. maenas</i></b>          |                        |          |        |         |                    |
| pH drop                          | 0.7490                 | -0.2890  | 0.3620 | -0.7982 | 0.4247             |
| stress metabolites               | 1.2156                 | 0.1953   | 0.2887 | 0.6762  | 0.4989             |
| donor                            | 1.4445                 | 0.3678   | 0.3385 | 1.0865  | 0.2773             |
| pH drop:stress metabolite        | 0.8674                 | -0.1422  | 0.4630 | -0.3072 | 0.7587             |
| pH drop:donor                    | <b>0.2870</b>          | -1.2484  | 0.6312 | -1.9777 | <b>0.0480</b>      |
| stress metabolites:donor         | <b>0.2981</b>          | -1.2102  | 0.5008 | -2.4165 | <b>0.0157</b>      |
| pH drop:stress metabolites:donor | <b>6.0273</b>          | 1.7963   | 0.8261 | 2.1743  | <b>0.0297</b>      |
| <b><i>H. diversicolor</i></b>    |                        |          |        |         |                    |
| pH drop                          | <b>0.3043</b>          | -1.1899  | 0.3045 | -3.9075 | <b>&lt; 0.0001</b> |
| stress metabolites               | <b>0.3520</b>          | -1.0442  | 0.3049 | -3.4251 | <b>0.0006</b>      |
| donor                            | 0.6965                 | -0.3616  | 0.2258 | -1.6013 | 0.1093             |
| pH drop:stress metabolites       | <b>3.9914</b>          | 1.3841   | 0.4411 | 3.1376  | <b>0.0017</b>      |
| pH drop:donor                    | <b>2.4669</b>          | 0.9030   | 0.3816 | 2.3663  | <b>0.0180</b>      |
| stress metabolites:donor         | 1.7318                 | 0.5492   | 0.3816 | 1.4390  | 0.1501             |
| pH drop:stress metabolites:donor | <b>0.2291</b>          | -1.4736  | 0.5633 | -2.6158 | <b>0.0089</b>      |

609



610 **Table 2.** Results of the binomial generalised linear model for the main effects of predictors (pH drop, stress  
 611 metabolites, donor) on the avoidance behaviour in small hermit crab (*Diogenes pugilator*, n = 320 observations  
 612 of finding a food cue), green shore crab (*Carcinus maenas*, n = 151 observations of finding a food cue), and  
 613 harbour ragworm (*Hediste diversicolor*, n = 325 observations of burrowing head in sediment). Due to missing  
 614 observations in conspecific control metabolites at control pH in *Hediste diversicolor*, data was analysed with  
 615 two models. Model 1: effect of donor across all treatments (sample size: 253 observations). Model 2: effects  
 616 of pH and metabolites in subset receiving *S. aurata* metabolites (sample size: 154 observations). Overall  
 617 significance of models from Chi-squared analyses of deviance when including only predictors were: *D.*  
 618 *pugilator*: P < 0.0001; *C. maenas*: P < 0.0001; *H. diversicolor*: P < 0.0001 (model 1) and P < 0.0001 (model  
 619 2). Covariates were dropped from models after analyses of deviance showed that they passed the Chi-squared  
 620 test (*D. pugilator*: number of water uses: P = 0.5963, crab size: P = 0.9158; *C. maenas*: crab size: P = 0.2710).  
 621 Significance (P ≤ 0.05) is shown by p-values in bold. SE is the standard error of estimate.  
 622

| Predictors                        | Estimate | SE        | Z              | P                  |
|-----------------------------------|----------|-----------|----------------|--------------------|
| <b><i>D. pugilator</i></b>        |          |           |                |                    |
| (Intercept)                       | -0.9694  | 0.3541    | -2.7380        | 0.0062             |
| pH drop                           | 0.1221   | 0.4944    | 0.2470         | 0.8049             |
| stress metabolites                | -0.1292  | 0.5086    | -0.2540        | 0.7995             |
| donor                             | 1.1701   | 0.4758    | <b>2.4590</b>  | <b>0.0139</b>      |
| pH drop:stress metabolites        | -0.2603  | 0.7219    | -0.3610        | 0.7185             |
| pH drop:donor                     | 0.7758   | 0.6919    | 1.1210         | 0.2622             |
| stress metabolites:donor          | 1.0272   | 0.7022    | 1.4630         | 0.1435             |
| pH drop:stress metabolites:donor  | -0.8890  | 1.0039    | -0.8860        | 0.3759             |
| <b><i>C. maenas</i></b>           |          |           |                |                    |
| (Intercept)                       | -0.2224  | 0.6725    | -0.3307        | 0.7409             |
| pH drop                           | -1.1263  | 0.9173    | -1.2279        | 0.2195             |
| stress metabolites                | -1.1263  | 0.9173    | -1.2279        | 0.2195             |
| donor                             | -0.4626  | 0.8326    | -0.5556        | 0.5785             |
| number of water uses              | -0.3077  | 0.1556    | <b>-1.9772</b> | <b>0.0480</b>      |
| pH drop:stress metabolites        | 2.2527   | 1.2978    | 1.7357         | 0.0826             |
| pH drop:donor                     | 5.5551   | 1.5392    | <b>3.6090</b>  | <b>0.0003</b>      |
| stress metabolites:donor          | 3.8799   | 1.2465    | <b>3.1127</b>  | <b>0.0019</b>      |
| pH drop:stress metabolites:donor  | -7.5415  | 1.9329    | <b>-3.9017</b> | <b>0.0001</b>      |
| <b><i>H. diversicolor</i></b>     |          |           |                |                    |
| Model 1 (both donors)             |          |           |                |                    |
| (Intercept)                       | 0.2801   | 0.3790    | 0.7391         | 0.4598             |
| donor                             | 1.0944   | 0.3169    | <b>3.4534</b>  | <b>0.0006</b>      |
| number of water uses              | -0.7745  | 0.1462    | <b>-5.2980</b> | <b>&lt; 0.0001</b> |
| Model 2 ( <i>S. aurata</i> donor) |          |           |                |                    |
| (Intercept)                       | -0.6931  | 0.5000    | -1.3863        | 0.1657             |
| pH drop                           | -18.8729 | 1603.1137 | -0.0118        | 0.9906             |
| stress metabolites                | 3.3557   | 0.7788    | <b>4.3086</b>  | <b>&lt; 0.0001</b> |
| pH drop:stress metabolites        | 16.2548  | 1603.1138 | 0.0101         | 0.9919             |

623

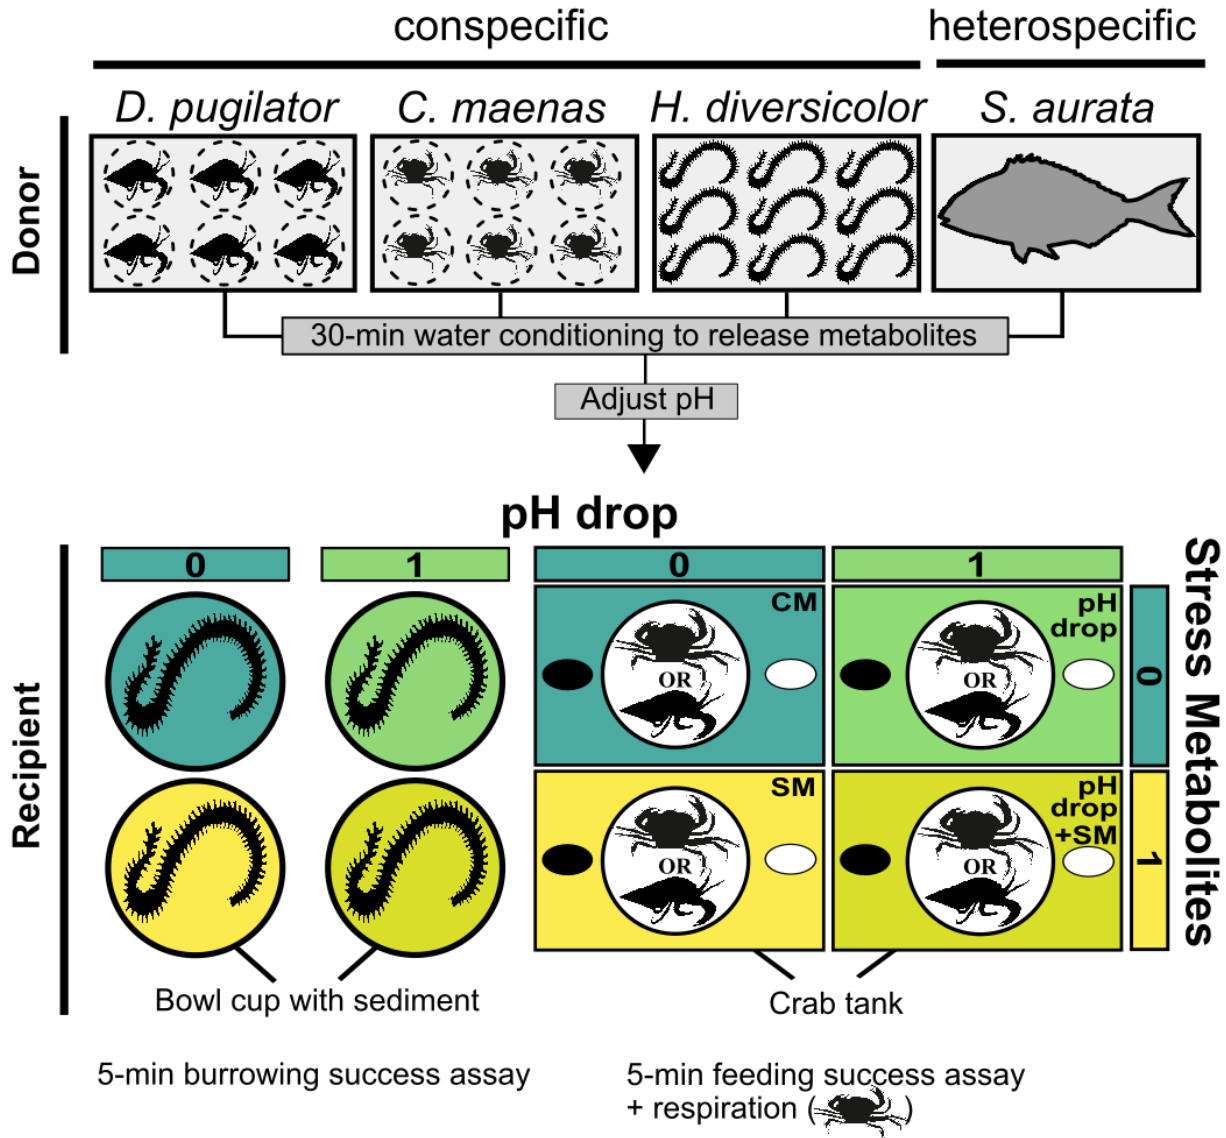

625

626 **Figure 1.** Schematic experimental design showing the presence vs. absence of predictors (pH drop, stress  
 627 metabolites, donor). Behavioural effects of short-term acute pH drop and stress metabolites it induced were  
 628 tested in three species: *Diogenes pugilator*, *Carcinus maenas*, and *Hediste diversicolor*. Metabolites were  
 629 obtained by conditioning donors in either control pH = 8.2 (releasing putative control metabolites), or pH drop  
 630 = 7.6 (releasing putative stress metabolites), followed by pH adjustments for factorial design yielding four  
 631 experimental conditions CM, pH drop, SM, and pH drop+SM. Predictors are binary coded as 0 (control  
 632 metabolites, control pH) and 1 (stress metabolites, pH drop). Metabolites originated from conspecifics or the  
 633 heterospecific *Sparus aurata*. Behaviour assays for crabs consisted in locating a feeding cue in 300 seconds.  
 634 Specimens of *H. diversicolor* were placed on top of sediment and burrowing behaviour was recorded for 300  
 635 seconds. A range of avoidance behaviours were also recorded. After completing the feeding assay, *C. maenas*  
 636 additionally underwent five minutes of respiration rate measurements. Experimental conditions were CM:  
 637 control metabolites in control pH, SM: control metabolites in control pH, pH drop: control metabolites in pH  
 638 drop, pH drop+SM: stress metabolites in pH drop. Animal drawings by A. Murcia and KCWV.

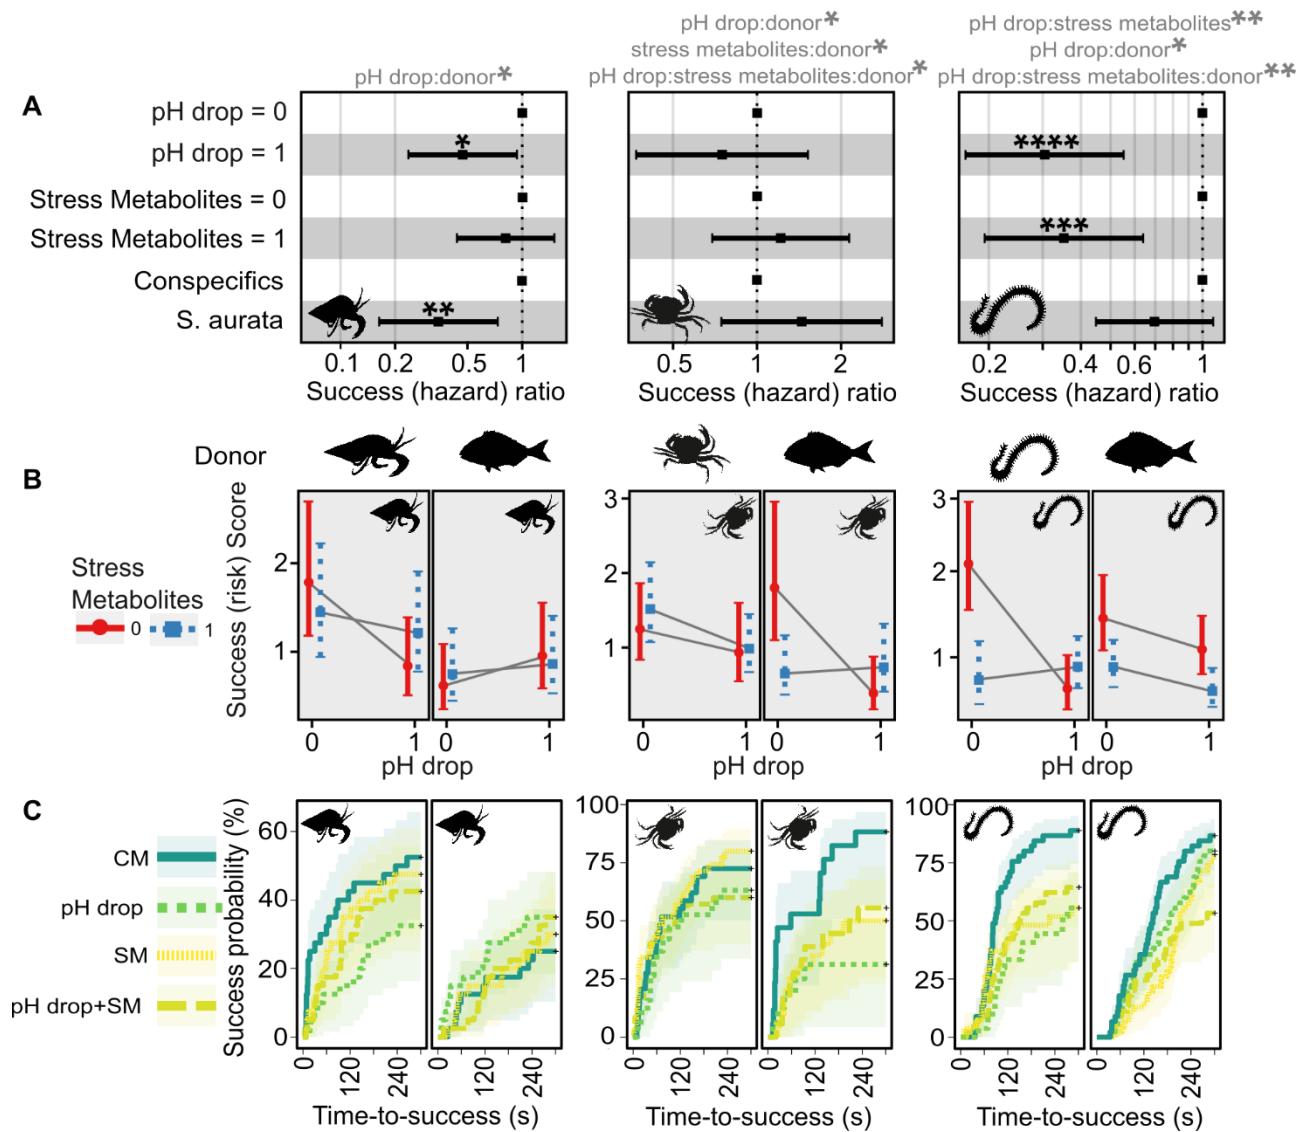

639

640 **Figure 2.** Effects of predictors (pH drop, stress metabolites, donor) on time-to-success in *Diogenes pugilator*,  
 641 *Carcinus maenas*, and *Hediste diversicolor*. A) effects of predictors on success ratio (aka hazard ratio with  
 642 success as event, arbitrary units). Likelihood ratio tests for overall model fit were: *D. pugilator*:  $P = 0.06$ ; *C.*  
 643 *maenas*:  $P = 0.009$ ; *H. diversicolor*:  $P < 0.0001$ ). Significant predictors from Cox proportional hazard models  
 644 are shown with asterisks, and significant interaction terms are shown in grey above the plots. B) Interaction  
 645 term plot of marginal effects showing predicted success score (aka risk score with success as event, arbitrary  
 646 units  $\pm$  confidence interval) split by donor and recipient species. Crossed solid grey lines represent an  
 647 interacting effect of pH and metabolites. C) Kaplan-Meier curves to visualise success probability (cumulative  
 648 event) for each experimental condition over time. \*:  $P \leq 0.05$ , \*\*:  $P < 0.01$ , \*\*\*:  $P < 0.001$ , \*\*\*\*:  $P < 0.0001$ .  
 649 Experimental treatments were: CM: control metabolites in control pH, pH drop: control metabolites in pH  
 650 drop, SM: stress metabolites in control pH, pH drop+SM: stress metabolites in pH drop.

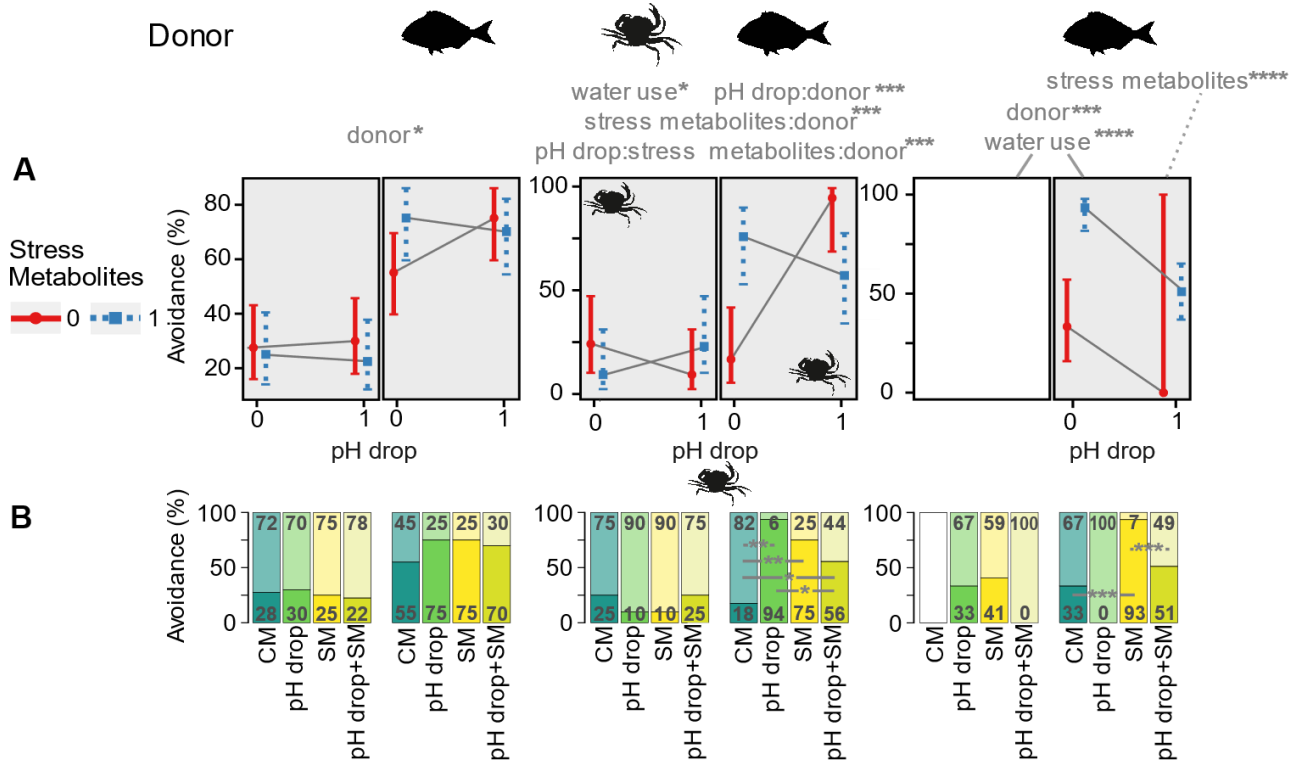

651

652 **Figure 3.** Effects of predictors (pH drop, stress metabolites, donor) on the percentage of avoidance behaviour  
653 in *Diogenes pugilator*, *Carcinus maenas*, and *Hediste diversicolor*. Avoidance behaviour included freezing  
654 and escaping (*D. pugilator* and *C. maenas*), or freezing, curling, flipping, and slime secretion (*H. diversicolor*).  
655 A) Split bars represent the presence (dark area) or absence (light area) of avoidance behaviours. Significant  
656 main predictors (and their interaction terms) and covariates are shown above plots. Significant pairwise  
657 comparisons between treatments in each donor/recipient are shown as horizontal grey lines. \*:  $P \leq 0.05$ , \*\*:  $P$   
658  $< 0.01$ , \*\*\*:  $P < 0.001$ , \*\*\*\*:  $P < 0.0001$ . Experimental treatments were: CM: control metabolites in control  
659 pH, pH drop: control metabolites in pH drop, SM: stress metabolites in control pH, pH drop+SM: stress  
660 metabolites in pH drop. (B) Interaction plot showing the marginal effects on the predicted avoidance  
661 percentages ( $\pm$  confidence interval) of stress metabolites and pH drop within the conspecific and heterospecific  
662 groups for each species. Crossing solid grey lines represent an interacting effect of pH and metabolites for each  
663 donor. The interactive effects of predictors for *H. diversicolor/H. diversicolor* are not represented due to the  
664 missing CM treatment. Overall effects of donor and water use across the response of *H. diversicolor* (for either  
665 donor) are shown with solid lines, whereas the effects of stress metabolites are for *S. aurata/H. diversicolor*  
666 only (grey dashed line).
